# Supplementary material for: Attachment, Resilience and Life Satisfaction of University Students in Cyprus after the Fourth Wave of COVID-19
Source: MDPI journal article supplement (doi:10.3390/ijerph21010022), 2023-12-22
Supplement: s1 [file s1]

**Table S1.** Internal Consistency for attachment dimensions, resilience and LF.

| Scales                     | Cronbach's Alpha |
|----------------------------|------------------|
| Attachment Anxiety         | 0.906            |
| Attachment Avoidance       | 0.916            |
| Total Resilience           | 0.907            |
| Resilience Self-efficacy   | 0.872            |
| Resilience Self-Confidence | 0.850            |
| Life Satisfaction          | 0.899            |

**Table S2.** Demographic characteristics of the sample.

| Demographic Variable          | University Students<br>( <i>n</i> = 780) |
|-------------------------------|------------------------------------------|
| Gender:                       |                                          |
| Men                           | 41.4% ( <i>n</i> = 323)                  |
| Women                         | 58.6% ( <i>n</i> = 457)                  |
| Nationality:                  |                                          |
| Cypriots                      | 45.8% ( <i>n</i> = 357)                  |
| Greeks                        | 54.2% ( <i>n</i> = 423)                  |
| Marital Status:               |                                          |
| Single                        | 88.2% ( <i>n</i> = 688)                  |
| Married/Engaged               | 10.3% ( <i>n</i> = 80)                   |
| Divorced                      | 1.3% ( <i>n</i> = 10)                    |
| Widowed                       | 0.3% ( <i>n</i> = 2)                     |
| Residence Status:             |                                          |
| Living Alone                  | 47.3% ( <i>n</i> = 369)                  |
| Living with partner           | 13.8% ( <i>n</i> = 108)                  |
| Living with Parents           | 27.7% ( <i>n</i> = 216)                  |
| Living with Roommates         | 11.2% ( <i>n</i> = 87)                   |
| Level of Study:               |                                          |
| Diploma                       | 6.3% ( <i>n</i> = 49)                    |
| Bachelor                      | 78.3% ( <i>n</i> = 611)                  |
| Master                        | 14.6% ( <i>n</i> = 114)                  |
| Doctorate                     | 0.8% ( <i>n</i> = 6)                     |
| Program of Study:             |                                          |
| Medicine                      | 9.5% ( <i>n</i> = 74)                    |
| Sciences                      | 24.5% ( <i>n</i> = 191)                  |
| Social Sciences               | 34.5% ( <i>n</i> = 269)                  |
| Humanities                    | 5.6% ( <i>n</i> = 44)                    |
| Education                     | 7.6% ( <i>n</i> = 59)                    |
| Business/Economics/Management | 15% ( <i>n</i> = 117)                    |
| Other                         | 3.% ( <i>n</i> = 26)                     |
| Year of Study:                |                                          |
| First                         | 20.5% ( <i>n</i> = 160)                  |
| Second                        | 27.4% ( <i>n</i> = 214)                  |
| Third                         | 19.6% ( <i>n</i> = 153)                  |
| Fourth                        | 24.9% ( <i>n</i> = 194)                  |
| Fifth                         | 6.9% ( <i>n</i> = 54)                    |
| Sixth+                        | 0.6% ( <i>n</i> = 5)                     |
| Mean Age                      | 22.00 ( <i>SD</i> = 3.39)                |

**Table S3.** Descriptive statistics.

|                | Attachment Anxiety | Attachment Avoidance | Life Satisfaction | Resilience Self-Efficacy | Resilience Self-Confidence | Resilience Total |
|----------------|--------------------|----------------------|-------------------|--------------------------|----------------------------|------------------|
| Mean           | 3.25               | 3.32                 | 23.08             | 16.79                    | 8.75                       | 25.54            |
| Median         | 3.22               | 3.39                 | 23.00             | 17.00                    | 9.00                       | 26.00            |
| Std. Deviation | 1.13               | 1.12                 | 7.00              | 4.95                     | 2.80                       | 7.22             |
| Minimum        | 1.00               | 1.00                 | 5.00              | 0.00                     | 0.00                       | 0.00             |
| Maximum        | 6.67               | 6.89                 | 35.00             | 24.00                    | 12.00                      | 36.00            |
| IQR            | 1.67               | 1.72                 | 10.00             | 7.00                     | 4.00                       | 10.00            |

**Table S4.** Spearman rho correlations coefficients between main variables.

|                               | 1       | 2       | 3      | 4      | 5      | 6     |
|-------------------------------|---------|---------|--------|--------|--------|-------|
| 1. Attachment Anxiety         | -----   |         |        |        |        |       |
| 2. Attachment Avoidance       | .377**  | -----   |        |        |        |       |
| 3. Life Satisfaction          | -.371** | -.440** | -----  |        |        |       |
| 4. Resilience Self-Efficacy   | -.264** | -.289** | .485** | -----  |        |       |
| 5. Resilience Self-Confidence | -.377** | -.360** | .591** | .699** | -----  |       |
| 6. Resilience Total           | -.335** | -.341** | .563** | .957** | .868** | ----- |

Note. Total n = 780, \*\*  $p < 0.001$ .

**Table S5.** Mediation analysis with attachment anxiety as the independent variable.

| Predictor          | b      | 95% CIs         | t      | Sig     | F (df)          | R <sup>2</sup> | Sig     |
|--------------------|--------|-----------------|--------|---------|-----------------|----------------|---------|
| Model 1            |        |                 |        |         |                 |                |         |
| Attachment Anxiety | -1.986 | [-2.416 -1.557] | -9.08  | p<0.001 | 82.5 (1, 778)   | 0.096          | p<0.001 |
| Model 2            |        |                 |        |         |                 |                |         |
| Resilience         | 0.504  | [0.447 0.560]   | 17.43  | p<0.001 |                 |                |         |
| Attachment Anxiety | -1.274 | [-1.638 -0.910] | -6.87  | p<0.001 | 235.14 (2, 777) | 0.377          | p<0.001 |
| Total Effect       |        |                 |        |         |                 |                |         |
| Total              | -2.274 | [-2.682 -1.866] | -10.95 | p<0.001 | 119.86 (1, 778) | 0.133          | p<0.001 |
| Indirect Effect    |        |                 |        |         |                 |                |         |
| Attachment Anxiety | -1.000 | [-1.265 -0.757] | -8.05* | p<0.001 |                 |                |         |

Note. \* Based on Sobel statistic. Dependent variable: Life Satisfaction.

**Table S6.** Mediation analysis with attachment avoidance as the independent variable.

| Predictor            | b      | 95% CIs         | t     | Sig     | F (df)        | R <sup>2</sup> | Sig     |
|----------------------|--------|-----------------|-------|---------|---------------|----------------|---------|
| Model 1              |        |                 |       |         |               |                |         |
| Attachment Avoidance | -2.167 | [-2.593 -1.741] | -9.99 | p<0.001 | 99.7 (1, 778) | 0.114          | p<0.001 |
| Model 2              |        |                 |       |         |               |                |         |
| Resilience           | 0.476  | [0.420 0.532]   | 16.69 | p<0.001 |               |                |         |

|                      |        |                 |        |         |                 |       |         |
|----------------------|--------|-----------------|--------|---------|-----------------|-------|---------|
| Attachment Avoidance | -1.696 | [-2.055 -1.336] | -9.25  | p<0.001 | 264.10 (2, 777) | 0.405 | p<0.001 |
| Total Effect         |        |                 |        |         |                 |       |         |
| Total                | -2.727 | [-3.122 -2.333] | -13.56 | p<0.001 | 183.95 (1, 778) | 0.191 | p<0.001 |
| Indirect Effect      |        |                 |        |         |                 |       |         |
| Attachment Avoidance | -1.032 | [-1.310 -0.780] | -9.25* | p<0.001 |                 |       |         |

Note. \* Based on Sobel statistic. Dependent variable: Life Satisfaction.

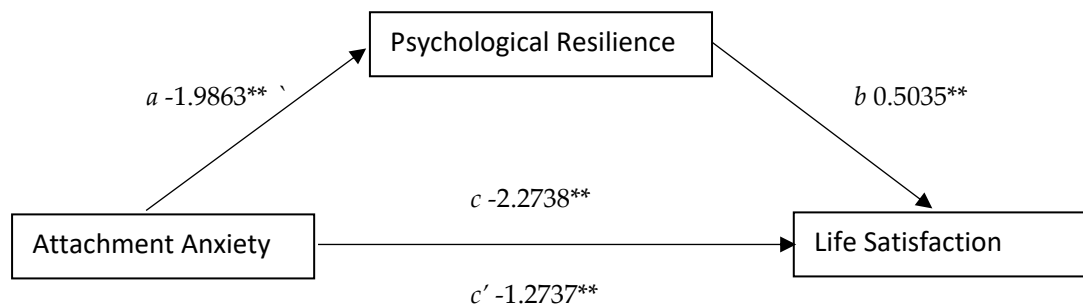

**Figure S1.** Model for mediation of psychological resilience in the relationship between attachment anxiety and LS.

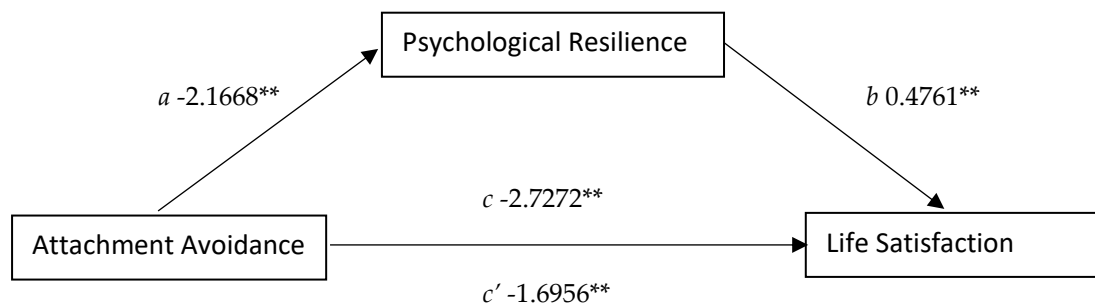

**Figure S2.** Model for mediation of psychological resilience in the relationship between attachment avoidance and LS.
